# Supplementary material
Source: Research Square preprint supplement (doi:10.21203/rs.3.rs-9600189/v1)
Supplement: Supplementary file 1 [file 66c0c8ef07f860acedc4d3ac.docx]

**Caption for supplementary files**

**S1.** Schematic presentation of RTE rice preparation from Vogali Bora rice of Assam.

**S2.** Detailed of RM marker used in marker-assisted selection of hybrid lines.

**S3.** Detailed data of segregation of days to 50% flowering trait in 500 F2 individual plants. Here EF, MF and LF means early flowering, middle flowering and late flowering, respectively.

**S4.** Detailed data of segregation analysis of anthocyanin deposition in immature spikelet of 500 F2 individual plants. Here SG means segregating group. SG1 and SG2 represent with anthocyanin deposition and without anthocyanin deposition, repectively.

**S5.** Graphical presentation of MSE with optimal Epochs cycle for varied yield attributes. (a) number of panicle/plant (NP/P), (b) Panicle length (PL), (c) Number of grains/panicle (NG/Pa) and 100 grain weight (Gwt).
