# Supplementary material
Source: Research Square preprint supplement (doi:10.21203/rs.3.rs-9600189/v1)
Supplement: Supplementary file 2 [file 810c52082b1130a15cec7f15.docx]

|  | When female plant VB09 | | | | When female plant VB548 | | | |
| --- | --- | --- | --- | --- | --- | --- | --- | --- |
| F2 plant type | EF | MF | LF | **Total** | EF | MF | LF | **Total** |
| Type I | 19 | 8 | 0 | 27 | 7 | 11 | 0 | 18 |
| Type II | 33 | 88 | 4 | 125 | 0 | 9 | 5 | 14 |
| Type III | 10 | 4 | 6 | 20 | 0 | 2 | 5 | 7 |
| Type IV | 13 | 20 | 1 | 34 | 0 | 7 | 2 | 9 |
| Type V | 0 | 21 | 3 | 24 | 20 | 18 | 1 | 39 |
| Type VI | 0 | 12 | 0 | 12 | 18 | 96 | 0 | 114 |
| Type VII | 0 | 3 | 0 | 3 | 11 | 1 | 0 | 12 |
| Type VIII | 0 | 5 | 0 | 5 | 12 | 23 | 2 | 37 |
| **Total** | **75** | **161** | **14** | **250** | **68** | **167** | **15** | **250** |

**S3.** Detailed data of segregation of days to 50% flowering trait in 500 F2 individual plants. Here EF, MF and LF means early flowering, middle flowering and late flowering, respectively.
