# Supplementary material
Source: Research Square preprint supplement (doi:10.21203/rs.3.rs-9600189/v1)
Supplement: Supplementary file 3 [file c0f74e73d20502c2b2aac1a1.docx]

|  | When female plant VB09 | | When female plant VB548 | | | Total |
| --- | --- | --- | --- | --- | --- | --- |
| F2 plant type | Number of plant | SG | F2 plant type | Number of plant | SG | (SG1+*SG1*)  SG1= **392** |
| Type II | 125 | SG1 | Type II | 14 | *SG1* |
| Type III | 20 | Type III | 7 |
| Type IV | 34 | Type IV | 9 |
| Type VI | 12 | Type VI | 114 |
| Type VII | 3 | Type VII | 12 |
| Type VIII | 5 | Type VIII | 37 |
| **Total** | **199** | **Total** | **193** |
| F2 plant type | Number of plant | SG | F2 plant type | Number of plant | SG | Total |
| Type I | 27 | SG2 | Type I | 18 | *SG2* | (SG2+*SG2*)  SG2= **108** |
| Type V | 24 | Type V | 39 |
| **Total** | **51** | **Total** | **57** |

**S4.** Detailed data of segregation analysis of anthocyanin deposition in immature spikelet of 500 F2 individual plants. Here SG means segregating group. SG1 and SG2 represent with anthocyanin deposition and without anthocyanin deposition, repectively.
