# Supplementary material
Source: Research Square preprint supplement (doi:10.21203/rs.3.rs-9600189/v1)
Supplement: Supplementary file 4 [file fbfa60b9ee030b26c0f8b3d6.docx]

| RM | Linked traits | Forward | Reverse | Annealing temperature (ᵒc) |
| --- | --- | --- | --- | --- |
| RM332 | Panicle length  (Fahliani et al., 2010) | GCGAAGGCGAAGGTGAAG | CATGAGTGATCTCACTCACCC | 63 |

**S2.** Detailed of RM marker used in marker-assisted selection of hybrid lines.

References for supplementary file S2:

Fahliani, R. A., Khodambashi, M., Houshmand, S., Arzani, A., & Sorkheh, K. (2011). Heritability for some agronomic characters of rice (*Oryza sativa* L.) and their linked microsatellites identification. *Turkish Journal of Agriculture and Forestry*, *35*(5), 481-490.
